# Supplementary material for: First-Generation Antihistamines and Seizures in Young Children
Source: PubMed Central journal article supplement (PMC11358850; doi:10.1001/jamanetworkopen.2024.29654), 2024-08-28
Supplement: jamanetwopen-e2429654-s001.pdf [file jamanetwopen-e2429654-s001.pdf]

## Supplementary Online Content

Kim JH, Ha EK, Han B, et al. First-generation antihistamines and seizures in young children. *JAMA Netw Open*. 2024;7(8):e2429654.  
doi:10.1001/jamanetworkopen.2024.29654

**eFigure.** Graphic Presentation of the Case-Crossover Design

**eTable 1.** Prescription Codes of Antihistamine Drugs

**eTable 2.** Seizure Event Risk Associated With First-Generation Antihistamine Use Only

This supplementary material has been provided by the authors to give readers additional information about their work.

**eFigure.** Graphic Presentation of the Case-Crossover Design

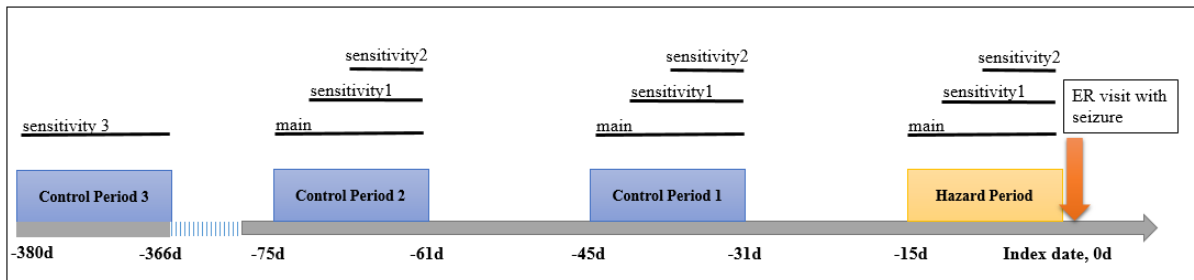

The observation period was comprised of a hazard period and two control periods. The figure primarily demonstrates that the time windows were 15 days, in comparison to 30 and 60 days prior to the index date. Arrows signify the date of first-generation antihistamine exposure, the index date, and day 0. Sensitivity analysis was conducted using window periods of 10 and 5 days. The final sensitivity analysis involved a comparison with the period 1-year prior.

**eTable 1. Prescription Codes of Antihistamine Drugs**

|                                                                      | Prescription code | General name                                                 | Prescribed event |
|----------------------------------------------------------------------|-------------------|--------------------------------------------------------------|------------------|
| <b>First generation antihistamines</b>                               |                   |                                                              | 101,929,428      |
|                                                                      | 1318              | Chlorpheniramine maleate                                     | 49,231,510       |
|                                                                      | 1905              | Mequitazine                                                  | 25,422,440       |
|                                                                      | 2062              | Oxatamide                                                    | 251,842          |
|                                                                      | 2133              | Piprinhydrate                                                | 17,327,415       |
|                                                                      | 1721              | Hydroxyzine hydrochloride                                    | 8,741,404        |
|                                                                      | 2119              | Phenylephrine hydrochloride                                  | 0                |
|                                                                      | 1193              | Buclizine 2HCl                                               | 275              |
|                                                                      | 1393              | Cyproheptadine                                               | 219,822          |
|                                                                      | 1459              | Dimenhydrinate                                               | 528,937          |
|                                                                      | 1692              | Homochlorcyclizine                                           | 180,268          |
|                                                                      | 2116              | Pheniramine maleate                                          | 10               |
|                                                                      | 2191              | Promethazine                                                 | 25,505           |
| <b>Compound medication including first generation antihistamines</b> |                   |                                                              | 202,840          |
|                                                                      | 5305              | Chlorpheniramine maleate + Phenylephrine hydrochloride       | 5,974            |
|                                                                      | 5306              |                                                              | 1,940            |
|                                                                      | 5307              |                                                              | 1,901            |
|                                                                      | 5308              |                                                              | 102,748          |
|                                                                      | 5309              |                                                              | 55,943           |
|                                                                      | 5302              |                                                              | 0                |
|                                                                      | 5303              |                                                              | 0                |
|                                                                      | 5310              | Pseudoephedrine hydrochloride + Triprolidine hydrochloride   | 1,202            |
|                                                                      | 5311              |                                                              | 134              |
|                                                                      | 5312              |                                                              | 39               |
|                                                                      | 5313              |                                                              | 5,883            |
|                                                                      | 5314              |                                                              | 372              |
|                                                                      | 5315              |                                                              | 25,963           |
|                                                                      | 5316              |                                                              | 741              |
|                                                                      | 5324              | Dextromethorphan+Pseudoephedrine+ Triprolidine hydrochloride | 0                |

**eTable 2.** Seizure Event Risk Associated With First-Generation Antihistamine Use Only

| Time window before the index date | Total N | N (%)         |                  |                  | Crude OR (95% CI) <sup>b</sup> | Adjusted OR (95% CI) <sup>c</sup> |
|-----------------------------------|---------|---------------|------------------|------------------|--------------------------------|-----------------------------------|
|                                   |         | Hazard period | Control period 1 | Control period 2 |                                |                                   |
| 1–15 days <sup>a</sup>            | 3,164   | 1,470         | 1,233            | 1,273            | 1.361 (1.232-1.504)            | 1.364 (1.232-1.509)               |
| 1–10 days <sup>a</sup>            | 2,534   | 1,145         | 934              | 954              | 1.263 (1.164-1.369)            | 1.253 (1.153-1.360)               |
| 1–5 days <sup>a</sup>             | 1,644   | 732           | 562              | 553              | 1.361 (1.232-1.504)            | 1.364 (1.232-1.509)               |

Abbreviations: CI, confidence interval; N, number; OR, odds ratio.

<sup>a</sup> The hazard period is the time window just before the index date, while the control periods are the same duration, starting 31 and 61 days before the index date.

<sup>b</sup> Crude ORs calculated by multivariable conditional logistic regression to assess the association between first-generation antihistamine and seizure events.

<sup>c</sup> Adjusted OR was adjusted for various factors including age, sex, residential area, economic status, season at the index date, and perinatal conditions.
